# Supplementary material
Source: PubMed Central journal article supplement (PMC240736)

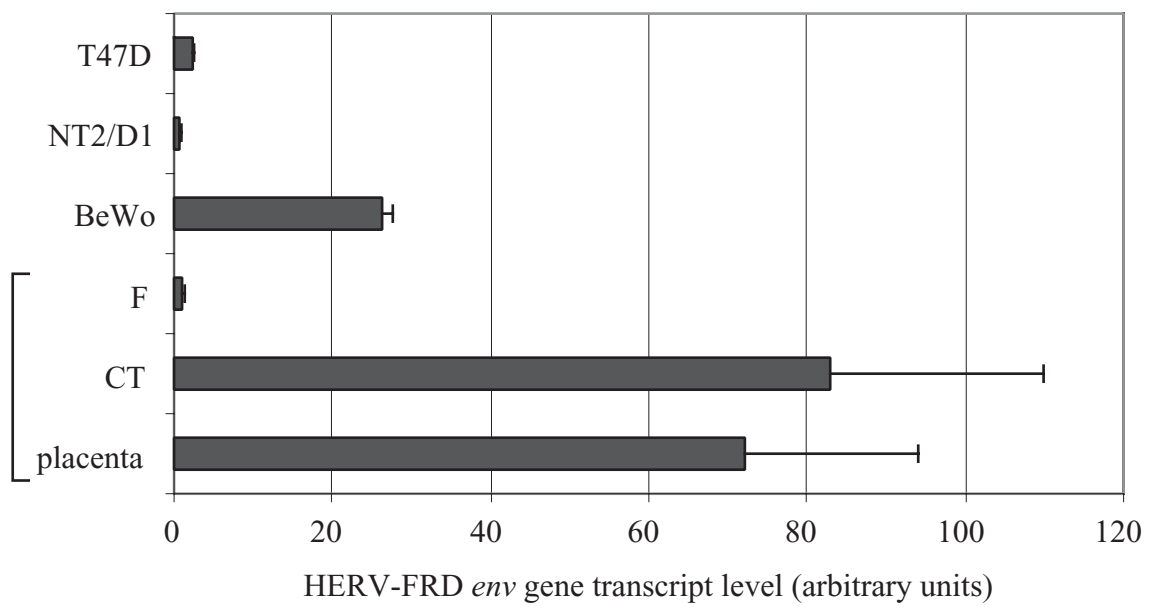

Supplement: pnas_100_22_13013__3.pdf [file pnas_100_22_13013__3.pdf]
